# Supplementary material
Source: Springer Nature journal article supplement (https://www.springermedizin.de/resource/supplementary/12936_2013_3336_MOESM5_ESM.pdf/9545664)
Supplement: MOESM5 [file 9545664]

**Additional File 5:****Sensitivity to uncertainty in travel patterns – analysis of Uganda**

As discussed in the main text and shown in Additional file 1, there is limited information on reason for travel in many African countries. For a limited number of countries we found estimates of reason for travel from other countries, but none specifically from the UK (Table S1, Additional File 1). Since there were 55 *Plasmodium falciparum* cases in the UK and we had additional data for travel in Uganda (for all travelers, not just UK), we investigated the impact of variation in travel patterns by repeating the analysis in the main text solely for Uganda. Table S3 (below) shows the results for the TravelPac data (line 1 of Table S1, Additional file 1) and Table S4 (below) shows the results for the international data from the Ugandan government website (last line of Table S1, Additional file 1)

**Table S3:** Characteristics of cases reported amongst travellers to Uganda and estimated hazard ratio (univariable model) and adjusted hazard ratio (multivariable model) for acquiring malaria conditional on the estimated level of exposure in the destination country, using reason for travel data from the IPS

|                    |    | TravelPac data            |                |          | All travelers data        |                |          |
|--------------------|----|---------------------------|----------------|----------|---------------------------|----------------|----------|
|                    |    | Adjusted hazard ratio     |                | <i>p</i> | Adjusted hazard ratio     |                |          |
| Cases              |    | (95% confidence interval) |                |          | (95% confidence interval) |                | <i>p</i> |
| <b>Purpose</b>     |    |                           |                | <0.01    |                           |                |          |
| VFR                | 34 | 3.28                      | (1.91 - 7.85)  | <0.01    | 4.16                      | (2.59 - 40.34) | <0.01    |
| Misc               | 2  | 0.1                       | (0.06 - 0.43)  | 0.36     | 0.12                      | (0.11 - 2.12)  | 0.32     |
| Business           | 3  | 3.21                      | (0.61 - 9.89)  | 0.08     | 4.41                      | (0.93 - 40.03) | 0.07     |
| Holiday            | 5  | 1                         |                |          | 1                         |                |          |
| Missing            | 11 |                           |                |          |                           |                |          |
| <b>Age (years)</b> |    |                           |                | <0.001   |                           |                |          |
| 0-15               | 8  | 0.23                      | (0.24 - 0.45)  | <0.01    | 0.32                      | (0.15 - 0.52)  | <0.01    |
| 16-24              | 9  | 0.1                       | (0.18 - 0.39)  | <0.001   | 0.12                      | (0.06 - 0.37)  | <0.001   |
| 25-34              | 13 | 0.3                       | (0.4 - 0.83)   | <0.01    | 0.24                      | (0.14 - 0.59)  | <0.001   |
| 35-44              | 13 | 0.73                      | (0.62 - 3.54)  | 0.3      | 0.64                      | (0.36 - 1.74)  | 0.32     |
| 45-54              | 7  | 1.24                      | (0.98 - 45.02) | 0.61     | 1.77                      | (0.87 - 16.89) | 0.76     |
| 55-64              | 3  | 0.99                      | (0.97 - 72.77) | 0.81     | 0.76                      | (0.3 - 13.27)  | 0.46     |
| 65 & over          | 1  | 1                         |                |          | 1                         |                |          |
| Missing            | 1  |                           |                |          |                           |                |          |

**Table S4:** Characteristics of cases reported amongst travellers to Uganda and estimated hazard ratio (univariable model) and adjusted hazard ratio (multivariable model) for acquiring malaria conditional on the estimated level of exposure in the destination country, using reason for travel data from the national data on international travellers from all countries (see Table S1).

|                    | Cases | TravelPac data            |                |        | All travelers data        |                |         |
|--------------------|-------|---------------------------|----------------|--------|---------------------------|----------------|---------|
|                    |       | Adjusted hazard ratio     |                | $p$    | Adjusted hazard ratio     |                | $p$     |
|                    |       | (95% confidence interval) |                |        | (95% confidence interval) |                |         |
| <b>Purpose</b>     |       |                           |                | <0.001 |                           |                | <0.0001 |
| VFR                | 34    | 3.28                      | (1.73 - 7.72)  | <0.001 | 4.21                      | (2.82 - 35.88) | <0.01   |
| Misc               | 2     | 0.1                       | (0.06 - 0.42)  | 0.36   | 0.13                      | (0.11 - 1.72)  | 0.32    |
| Business           | 3     | 3.21                      | (0.62 - 10.49) | 0.08   | 4.48                      | (0.95 - 33.59) | 0.07    |
| Holiday            | 5     |                           | 1              |        |                           | 1              |         |
| Missing            | 11    |                           |                |        |                           |                |         |
| <b>Age (years)</b> |       |                           |                | <0.001 |                           |                |         |
| 0-15               | 8     | 0.22                      | (0.22 - 0.42)  | <0.01  | 0.32                      | (0.15 - 0.68)  | <0.01   |
| 16-24              | 9     | 0.1                       | (0.18 - 0.38)  | <0.001 | 0.12                      | (0.07 - 0.33)  | <0.001  |
| 25-34              | 13    | 0.29                      | (0.41 - 0.91)  | <0.01  | 0.24                      | (0.14 - 0.55)  | <0.001  |
| 35-44              | 13    | 0.71                      | (0.9 - 3.49)   | 0.29   | 0.64                      | (0.36 - 1.74)  | 0.32    |
| 45-54              | 7     | 1.19                      | (0.94 - 27.56) | 0.70   | 1.78                      | (0.75 - 11.37) | 0.85    |
| 55-64              | 3     | 0.95                      | (0.97 - 78.49) | 0.80   | 0.76                      | (0.3 - 20.28)  | 0.52    |
| 65 & over          | 1     |                           | 1              |        |                           | 1              |         |
| Missing            | 1     |                           |                |        |                           |                |         |

Since the travel patterns were similar between the data from the IPS and from the national data, the estimates are very similar. This similarity also shows the dominance of the effect of the number of cases from a particular age-group or for a particular reason for travel.
